# Supplementary material for: Comparable genetic alteration profiles between gastric cancers with current and past Helicobacter pylori infection
Source: PubMed Central journal article supplement (PMC8648804; doi:10.1038/s41598-021-02761-7), 2021-12-06
Supplement: 41598_2021_2761_MOESM1_ESM.pdf [file 41598_2021_2761_MOESM1_ESM.pdf]

**Comparable genetic alteration profiles between gastric cancers with current and past *Helicobacter pylori* infection**

**Sho Tsuyuki, Hideyuki Takeshima, Shigeki Sekine, Yukinori Yamagata, Takayuki Ando,  
Satoshi Yamashita, Shin Maeda, Takaki Yoshikawa, and Toshikazu Ushijima**

**Supplementary Table S1. Frequency of SNPs**

| SNP/dbSNP | gene          | Chromosome | Region    | Type | Nucleotide change | Amino acid change | Cases in this study<br>N (Frequency) | Cases in ToMMo 4.7K JPN<br>N (Frequency) | <i>p</i> value            |
|-----------|---------------|------------|-----------|------|-------------------|-------------------|--------------------------------------|------------------------------------------|---------------------------|
| SNP       | <i>PIK3CA</i> | chr3       | 178938877 | SNV  | c.2119G>A         | p.Glu707Lys       | 36 (0.500)                           | 0 (0)                                    | < 2.2 x 10 <sup>-16</sup> |
|           | <i>TP53</i>   | chr17      | 7578283   | SNV  | c.566C>T          | p.Ala189Val       | 1 (0.014)                            | 0 (0)                                    | 0.007                     |
|           | <i>ATM</i>    | chr11      | 108236200 | SNV  | c.9136A>G         | p.Ser3046Gly      | 1 (0.014)                            | 1 (1.05 x 10 <sup>-4</sup> )             | 0.015                     |
|           | <i>KDR</i>    | chr4       | 55980324  | SNV  | c.767T>C          | p.Ile256Thr       | 1 (0.014)                            | 5 (5.24 x 10 <sup>-4</sup> )             | 0.044                     |
|           | <i>MLH1</i>   | chr3       | 37067242  | SNV  | c.1153C>T         | p.Arg385Cys       | 1 (0.014)                            | 7 (7.33 x 10 <sup>-4</sup> )             | 0.058                     |
|           | <i>MET</i>    | chr7       | 116411986 | SNV  | c.3025C>T         | p.Pro1009Ser      | 1 (0.014)                            | 7 (7.33 x 10 <sup>-4</sup> )             | 0.058                     |
|           | <i>KDR</i>    | chr4       | 55946163  | SNV  | c.4016C>T         | p.Thr1339Ile      | 1 (0.014)                            | 12 (1.26 x 10 <sup>-3</sup> )            | 0.093                     |
|           | <i>MET</i>    | chr7       | 116340263 | SNV  | c.1125C>G         | p.Asn375Lys       | 1 (0.014)                            | 13 (1.36 x 10 <sup>-3</sup> )            | 0.100                     |
|           | <i>NOTCH1</i> | chr9       | 139399426 | SNV  | c.4717A>G         | p.Thr1573Ala      | 1 (0.014)                            | 13 (1.36 x 10 <sup>-3</sup> )            | 0.100                     |
|           | <i>KIT</i>    | chr4       | 55593461  | SNV  | c.1618G>C         | p.Val540Leu       | 1 (0.014)                            | 41 (4.29 x 10 <sup>-3</sup> )            | 0.271                     |
|           | <i>TP53</i>   | chr17      | 7579882   | SNV  | c.31G>C           | p.Glu11Gln        | 1 (0.014)                            | 67 (7.02 x 10 <sup>-3</sup> )            | 0.401                     |
|           | <i>CDKN2A</i> | chr9       | 21971161  | SNV  | c.197A>G          | p.His66Arg        | 1 (0.014)                            | 82 (8.60 x 10 <sup>-3</sup> )            | 0.466                     |
| dbSNP     | <i>KDR</i>    | chr4       | 55972974  | SNV  | c.1416A>T         | p.Gln472His       | 43 (0.597)                           | 3819 (0.400)                             | 0.001                     |
|           | <i>JAK3</i>   | chr19      | 17945696  | SNV  | c.2164G>A         | p.Val722Ile       | 1 (0.014)                            | 0 (0)                                    | 0.007                     |
|           | <i>STK11</i>  | chr19      | 1223125   | SNV  | c.1062C>G         | p.Phe354Leu       | 6 (0.083)                            | 407 (0.043)                              | 0.130                     |
|           | <i>KIT</i>    | chr4       | 55593464  | SNV  | c.1621A>C         | p.Met541Leu       | 5 (0.069)                            | 431 (0.045)                              | 0.262                     |
|           | <i>MLH1</i>   | chr3       | 37067240  | SNV  | c.1151T>A         | p.Val384Asp       | 4 (0.056)                            | 304 (0.032)                              | 0.294                     |
|           | <i>MET</i>    | chr7       | 116340262 | SNV  | c.1124A>G         | p.Asn375Ser       | 4 (0.056)                            | 353 (0.037)                              | 0.343                     |

**Supplementary Table S2. The list of samples with gene amplification.**

| Infection status | Sample | Gene          | Fold change | Reference  |
|------------------|--------|---------------|-------------|------------|
| Current          | B-GC1  | <i>ERBB2</i>  | 7.7         | this study |
|                  | B-GC38 | <i>PIK3CA</i> | 7.9         | this study |
|                  | B-GC73 | <i>ERBB2</i>  | 6.7         | this study |
|                  | B-GC88 | <i>KRAS</i>   | 4.8         | this study |
|                  | S17    | <i>ERBB2</i>  | 3.6         | [23]       |
|                  | S23    | <i>ERBB2</i>  | 10.5        | [23]       |
|                  | S36    | <i>ERBB2</i>  | 5.4         | [23]       |
| Past             | B-GC43 | <i>KRAS</i>   | 3.3         | this study |
|                  | B-GC45 | <i>ERBB2</i>  | 5.2         | this study |
|                  | B-GC91 | <i>MET</i>    | 4.8         | this study |

**Supplementary Table S3. The primer for quality check of DNA**

| Gene         | Forward Primer (5' -> 3') | Reverse primer (5' -> 3') | Amplified region        | Amplicon length(bp) | Reference |
|--------------|---------------------------|---------------------------|-------------------------|---------------------|-----------|
| <i>RPPH1</i> | GGAGGGAAGCTCATCAGTGG      | CGTTCTCTGGGAACCTCACCT     | chr14:20811419-20811563 | 145                 | [27]      |

**Supplementary Table S4. The primer for detection of *H. pylori***

| Gene         | GenBank number | Forward Primer (5' -> 3') | Reverse primer (5' -> 3') | Amplicon length(bp) | Reference |
|--------------|----------------|---------------------------|---------------------------|---------------------|-----------|
| <i>jhpr3</i> | NC000921       | AAGGATACTGCCTCCGTAAG      | ACAATCCGAACTGAGAGGTG      | 158                 | [8]       |

**Supplementary Table S5. Baseline characteristics of 90 patients**

| Characteristic            | <i>H. pylori</i> infection status |                        | <i>p</i> value |
|---------------------------|-----------------------------------|------------------------|----------------|
|                           | Current group<br>(N = 55)         | Past group<br>(N = 35) |                |
| Age at surgery, mean (SD) | 67.8 (11.7)                       | 73.4 (9.1)             | 0.033          |
| Gender, N (%)             |                                   |                        | 0.267          |
| Male                      | 38 (69.1)                         | 20 (57.1)              |                |
| Female                    | 17 (30.9)                         | 15 (42.9)              |                |
| Pathology of GC, N (%)    |                                   |                        | 0.394          |
| Differentiated type       | 29 (52.7)                         | 15 (42.9)              |                |
| pap                       | 2 (3.6)                           | 2                      |                |
| tub                       | 27 (49.1)                         | 13                     |                |
| Undifferentiated type     | 26 (47.3)                         | 20 (57.1)              |                |
| por                       | 24 (43.6)                         | 18 (51.4)              |                |
| sig                       | 1 (2.0)                           | 0 (0)                  |                |
| muc                       | 1 (2.0)                           | 2 (5.7)                |                |

Supplementary Table S6. Primers used for dideoxy sequencing

| Gene           | Target variation                                           | Forward Primer (5' -> 3') | Reverse primer (5' -> 3') | Amplified region          | Amplicon length(bp) | Reference  |
|----------------|------------------------------------------------------------|---------------------------|---------------------------|---------------------------|---------------------|------------|
| <i>ABL1</i>    | c.1107del                                                  | CGTGTGAAGTCCTCGTGT        | CCCCTACCTGTGGATGAAGTTT    | chr9:133748216-133748431  | 216                 | This study |
| <i>ABL1</i>    | c.1131_1132insG                                            | ATCTCGTCAGCCATGGAGTA      | AATGTGTTGCCAGCACTGAG      | chr9:133748378-133748551  | 174                 | This study |
| <i>ABL1</i>    | c.1281delC                                                 | GGTAGCTGATTTTGGCCCTGA     | GGAAAGCAAGAAAGAGGCCA      | chr9:133750303-133750515  | 213                 | This study |
| <i>ATM</i>     | c.9136A>G                                                  | GAAAGGAGTGGAAAGAGGCA      | AGAGTGAAAGCAGAGATGTCC     | chr11:108236115-108236438 | 324                 | This study |
| <i>BRAF</i>    | c.1406G>C                                                  | ACGGGACTCGAGTGTGATT       | GCGAACAGTGAATATTTCTTTGA   | chr7:140481274-140481479  | 206                 | This study |
| <i>CDH1</i>    | c.1203_1204insC                                            | AATCCTTTAGCCCCCTGAGA      | TCACTGGATTTGTGGTGACG      | chr16:68847139-68847369   | 231                 | This study |
| <i>CDH1</i>    | c.228delA                                                  | TCTCCACAAAGTTCCGTCT       | AATGTCAACGGTACCAAGGC      | chr16:68835486-68835881   | 396                 | This study |
| <i>CDKN2A</i>  | c.197A>G                                                   | ACACAAGCTTCCTTCCGTC       | ACCAGCGTGTCCAGGAAG        | chr9:21971074-21971273    | 200                 | This study |
| <i>CTNNB1</i>  | c.101G>A                                                   | GCTGATTGATGGAGTTGGAC      | TTGGGAGGTATCCACATCCT      | chr3:41266016-41266186    | 171                 | This study |
| <i>EGFR</i>    | c.2506delC                                                 | GAATTCGGATGCAGAGCTTC      | ATTCTTTCTTCCGCACCC        | chr7:55259346-55259547    | 202                 | This study |
| <i>ERBB2</i>   | c.2434G>A                                                  | GCAAACCCCTATGTCACAA       | TCTGCATGGTACTCTGTCTCGT    | chr17:37881199-37881447   | 249                 | This study |
| <i>ERBB2</i>   | c.955G>A                                                   | CTTGTTTTGTAGCTGTTGGTG     | CCTTGTATATAGGCCAGTCTCT    | chr2:212578210-212578442  | 233                 | This study |
| <i>ERBB4</i>   | c.1817A>G                                                  | GGGTCCTGACAACTGTACAAAG    | CCAGCAAGAATGCTTACCTT      | chr2:212530031-212530203  | 173                 | This study |
| <i>ERBB4</i>   | c.542delA                                                  | GCAGACACCATTCAITGGC       | GCATAACTATTTCAGCCAC       | chr2:212652683-212652834  | 152                 | This study |
| <i>ERBB4</i>   | c.719G>A                                                   | TTCTCTGGTGGCAGACTTT       | TAGGGAAGGAAAGGAGAGCA      | chr2:212589750-212589968  | 219                 | This study |
| <i>FBXW7</i>   | c.1514G>A                                                  | TGCAGAGTTGTTAGCGTTT       | ATTAGTATGCCCTGAAACG       | chr4:153247176-153247388  | 213                 | This study |
| <i>FBXW7</i>   | c.1393C>T,c.1394G>A                                        | TGGGACATACAGGTGGAGTAGT    | CTACACAGAAAGGCCCAAA       | chr4:153249289-153249525  | 237                 | This study |
| <i>FGFR1</i>   | c.352_355delGAGG, c.348delC, c.355delG                     | TCCGTGTTTCTGGAACCTG       | CTCTAAACCAATGCCAG         | chr8:38285808-38286038    | 231                 | This study |
| <i>FGFR2</i>   | c.1672delG                                                 | TGATGCCACAGAGAAAGACC      | GGAAAGCCAGCCATTCTAA       | chr10:123257932-123258118 | 187                 | This study |
| <i>FLT3</i>    | c.2011_2012insG                                            | CTAGCCTGGCTTCTCTATA       | CCACTGGGTTTGTAGAGTTC      | chr13:28602174-28602562   | 389                 | This study |
| <i>GNAS</i>    | c.2531G>A                                                  | TCTGAGCCCTTCTCCAAAC       | GGGGTGAATGTCAGAAACC       | chr20:57484301-57484536   | 236                 | This study |
| <i>JAK2</i>    | c.1847_1851delGTGTC                                        | TGGACAACAGTCAAACAA        | GACACCTAGCTGTGATCCTGAA    | chr9:5073651-5073877      | 227                 | This study |
| <i>KDR</i>     | c.767T>C                                                   | TCTGAGTCCGCTCATGGA        | GCAAACTTCACTGGGGCTTA      | chr4:55980229-55980410    | 182                 | This study |
| <i>KDR</i>     | c.4016C>T                                                  | TCACTCCGATGCACAGACA       | ACTTCTGCTGGTGGAAAGA       | chr4:55946019-55946252    | 234                 | This study |
| <i>KIT</i>     | c.1618G>C, c.1630delA                                      | TGTAGAGCAAAATCCATCC       | CATACATGGGTTTCTGTGGG      | chr4:55593379-55593594    | 216                 | This study |
| <i>KRAS</i>    | c.59G>T                                                    | GGCTGTGCTGAAAATGACTGA     | GAATGGTCTGCACCAAGTAA      | chr12:25398164-25398330   | 167                 | [29]       |
| <i>KRAS</i>    | c.183A>C                                                   | CCAGACTGTGTTTCTCCCTTCT    | AACCCACCTATAATGGTGAATATC  | chr12:25380161-25380371   | 211                 | This study |
| <i>KRAS</i>    | c.34G>A, c.35G>T, c.35G>A                                  | CGTCTGCAGTCAACTGGAAAT     | GAATGGTCTGCACCAAGTAA      | chr12:25398164-25398501   | 338                 | [29], [23] |
| <i>MET</i>     | c.1125C>G                                                  | ACAAATAGGAGCCAGCCTGA      | GTGGGGAACTGATGTGACTT      | chr7:116340131-116340360  | 230                 | This study |
| <i>MET</i>     | c.3025C>T                                                  | GCCCATGATAGCCGCTTTA       | TGTCACAACCCACTGAGGTA      | chr7:116411854-116412103  | 250                 | This study |
| <i>MLH1</i>    | c.1151T>A,c.1153C>T                                        | AGACTTTGCTACCAGGACTTGC    | CTTTGTGTATCCCCCTCCA       | chr3:37067126-37067448    | 323                 | [29], [23] |
| <i>NOTCH1</i>  | c.4717A>G, c.4723G>C                                       | ACCAGTACTGCAAGGACCACTT    | TCACGCTTGAAGACCACTGT      | chr9:139399317-139399545  | 229                 | This study |
| <i>NRAS</i>    | c.34G>T                                                    | GATGTGGCTGCCAAATTAAC      | TACCTCTATGGTGGGATCA       | chr1:115258667-115258840  | 174                 | This study |
| <i>PDGFRA</i>  | c.2515delC                                                 | CTTGCAGGGGTGATGCTATT      | AAAGTGAAAGGAGGATGAGCC     | chr4:55151940-55152177    | 238                 | This study |
| <i>PIK3CA</i>  | c.2091G>A, c.2119G>A                                       | TCCTATGTGCTGCATGTGG       | TCTGCTTGATCCAAGGACC       | chr3:178938826-178939049  | 224                 | This study |
| <i>PIK3CA</i>  | c.1031T>G                                                  | GCATTTCCACAGTACACCA       | TGGATGTTCTCTAACCATCTG     | chr3:178921447-178921696  | 250                 | This study |
| <i>PIK3CA</i>  | c.3140A>G                                                  | CTCAATGATGCTGGCTCTG       | CTATGCAATCGGTCTTTGCC      | chr3:178951951-178952237  | 287                 | This study |
| <i>PIK3CA</i>  | c.1624G>A,c.1633G>A                                        | CTGTGAATCCAGAGGGGAAA      | CATGCTGAGATCAGCCAAA       | chr3:178935934-178936201  | 268                 | [29], [23] |
| <i>PTEN</i>    | c.737delC,c.752G>T                                         | TGCAGATCTCAGTTTGTGG       | TGGATATTTCTCCAAATGAAAG    | chr10:89717605-89717810   | 206                 | This study |
| <i>PTPN11</i>  | c.182A>G, c.214G>A                                         | AATCCGACGTGGAAGATGAG      | CATTTCTGCACACTAGGGCAC     | chr12:112888037-112888378 | 342                 | [23]       |
| <i>RET</i>     | c.1940delT                                                 | AGCCATGAGGCAGAGCATATA     | CCTCCGGAAGGTCACTCTCA      | chr10:43609843-43610082   | 240                 | This study |
| <i>SMAD4</i>   | c.1525T>G                                                  | TGTCCTCTGATGCTTCCA        | AAGGTTGTGGGCTGCAATC       | chr18:48604591-48604829   | 239                 | This study |
| <i>SMAD4</i>   | c.1081C>T, c.1082G>A                                       | TGGATGTTCAAGTAGGAGAGAC    | CATGGGAAAACATAACCTTGA     | chr18:48591829-48592058   | 230                 | This study |
| <i>SMARCB1</i> | c.1129C>T, c.1130G>A                                       | CAGCCAGATCCAGTTTTT        | TGCCAGAAGATGGAGGAGA       | chr22:24176112-24176439   | 328                 | [29]       |
| <i>SMO</i>     | c.970G>A                                                   | AGTACAGAGTGACCCCTCAA      | ACAGTGAAGACAAAGGGGAGT     | chr7:128845946-128846188  | 243                 | This study |
| <i>TP53</i>    | c.811G>A, c.814G>A, c.818G>A, c.832C>T,                    | TCCTTACTGCCTCTTGCTTCTC    | TGAGGCATAACTGCACCCCTT     | chr17:7576964-7577195     | 232                 | This study |
| <i>TP53</i>    | c.376T>C, c.380C>T, c.388C>G, c.404G>A                     | GTTTCTTTGCTGCCGCTTTC      | TCATGTGCTGTGACTGCTTG      | chr17:7578422-7578637     | 216                 | [23]       |
| <i>TP53</i>    | c.523C>T, c.524G>A, c.535C>T, c.566C>T, c.565G>A, c.536A>G | TGTGCAGCTGTGGGTTGATT      | TCCACTCGGATAAGATGCTG      | chr17:7578256-7578504     | 249                 | This study |
| <i>TP53</i>    | c.844C>T, c.853G>A, c.857A>T                               | GCCTCTTGCTTCTTTTCC        | GCTTCTTGCTGCTTGTCTT       | chr17:7576997-7577187     | 191                 | This study |
| <i>TP53</i>    | c.730G>T, c.733G>A, c.742C>T, c.743G>A                     | AAAAAGGCCTCCCTGCTTG       | GGTGGATGGGTAGTAGTATGGAAG  | chr17:7577386-7577683     | 298                 | [29]       |
| <i>TP53</i>    | c.31G>C                                                    | TCAGACACTGGCATGGTGT       | ATTTTCGCTTCCACAGGTC       | chr17:7579756-7580044     | 289                 | This study |
| <i>TP53</i>    | c.637C>T,c.641A>G, c.659A>G, c.660T>G                      | CCTCTGATTCCTCACTGATTGC    | GGGAGGTCAAATAAGCAGCAG     | chr17:7578070-7578317     | 248                 | [29]       |
| <i>TP53</i>    | c.294_298delTTCCC                                          | AGATGAAGCTCCAGAAATGC      | GCCAGGCATTGAAGTCTCAT      | chr17:7579265-7579507     | 243                 | This study |
