# Supplementary material for: Comparable genetic alteration profiles between gastric cancers with current and past Helicobacter pylori infection
Source: PubMed Central journal article supplement (PMC8648804; doi:10.1038/s41598-021-02761-7), 2021-12-06
Supplement: 41598_2021_2761_MOESM2_ESM.pdf [file 41598_2021_2761_MOESM2_ESM.pdf]

**Comparable genetic alteration profiles between gastric cancers with current and past *Helicobacter pylori* infection**

**Sho Tsuyuki, Hideyuki Takeshima, Shigeki Sekine, Yukinori Yamagata, Takayuki Ando, Satoshi Yamashita, Shin Maeda, Takaki Yoshikawa, and Toshikazu Ushijima**

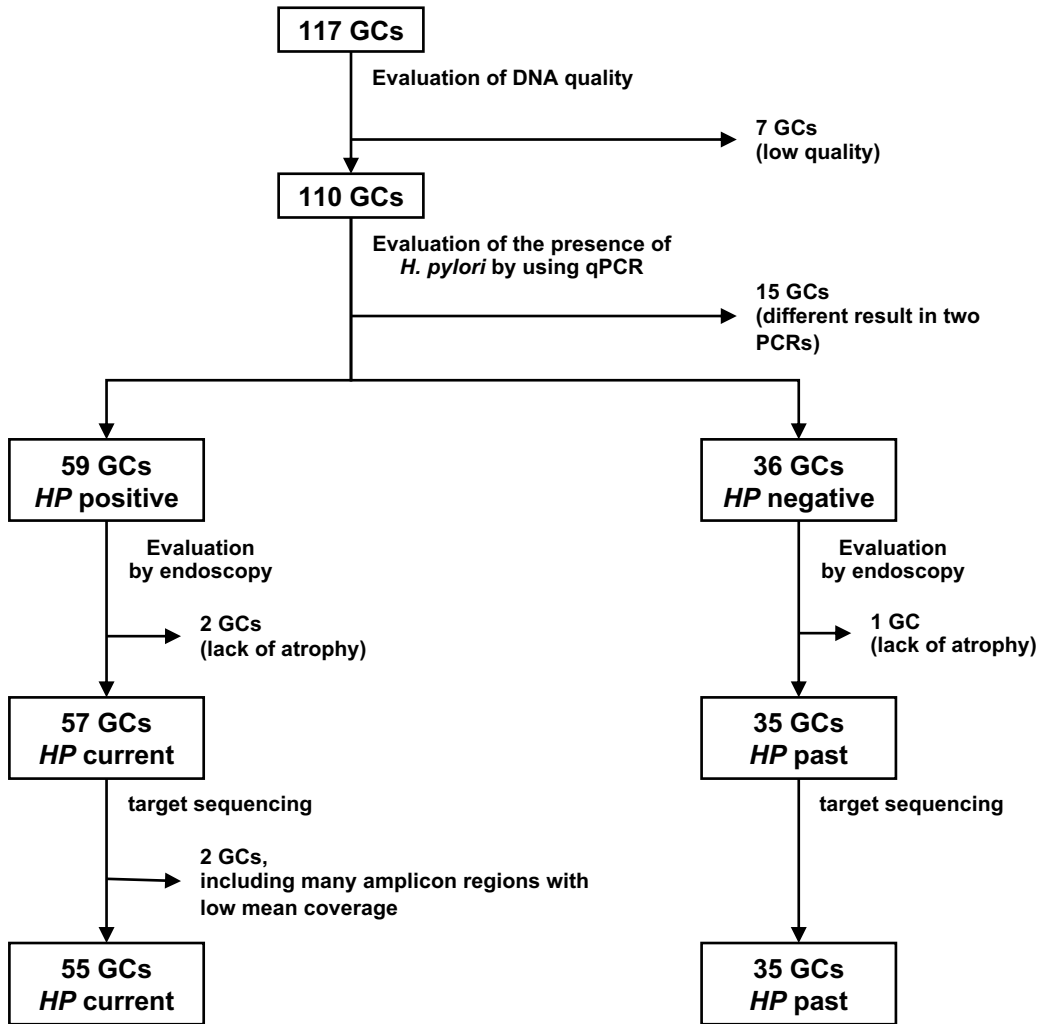

## Supplementary Fig. S1

A flowchart of how 90 patients were selected from 117 patients.
